# Supplementary material
Source: PubMed Central journal article supplement (PMC3474191)
Supplement: Supp_Fig1.pdf [file Supp_Fig1.pdf]

## Supplementary Data

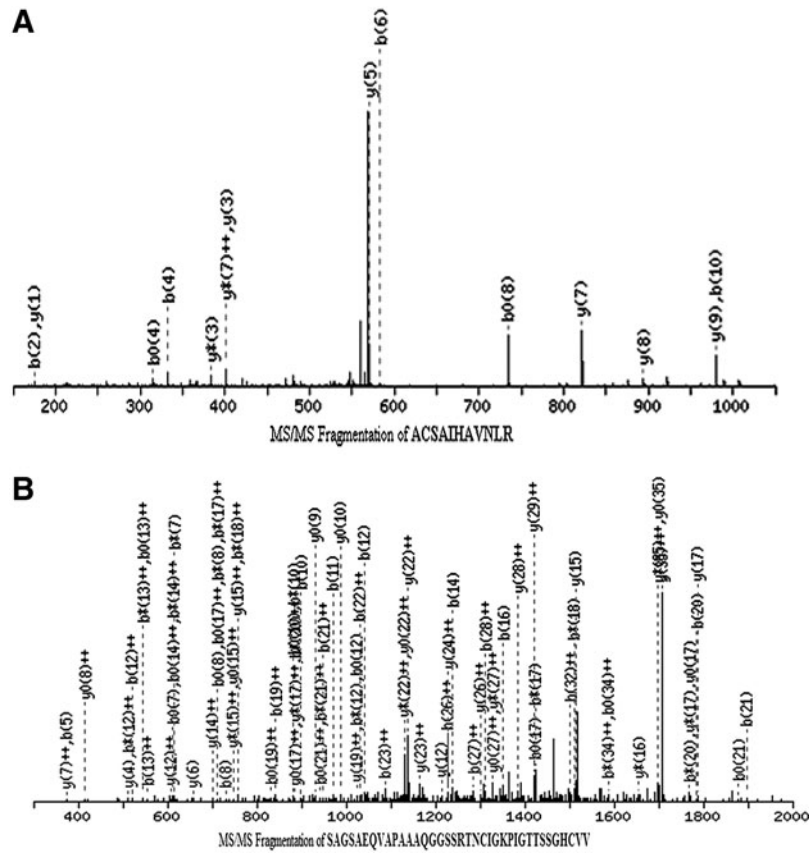

SUPPLEMENTARY FIG. S1. Acquired spectrum of peptides identified by mass spectrometry analysis corresponding to FLI-I (ACSAIHAVNLR) (A) and REPS2 SAGSAEQVAPAAAQGGSSRTNCIGKPIGTTSSGHCVV) (B) identified using a human data base (IPI-Human, NCBI).
