# Supplementary material
Source: PubMed Central journal article supplement (PMC3474191)
Supplement: Supp_Table1.pdf [file Supp_Table1.pdf]

SUPPLEMENTARY TABLE S1. GLUTATHIONYLATED PROTEINS IMMUNOPRECIPITATED AND IDENTIFIED BY MASS SPECTROMETRY FROM CONTROL CELLS

|                                                                                         |        |
|-----------------------------------------------------------------------------------------|--------|
| Poly(A)-specific ribonuclease PARN                                                      | 74 kD  |
| Protein flightless-1 homolog                                                            | 145 kD |
| RALBP1 associated Eps domain containing 2                                               | 73 kD  |
| Kinesin-like protein KIF3B                                                              | 85 kD  |
| Isoform 1 of Protocadherin alpha 7 precursor                                            | 101 kD |
| Lymphocyte cytosolic protein 2                                                          | 60 kD  |
| Utrophin                                                                                | 394 kD |
| Heterogeneous nuclear ribonucleoprotein U isoform a                                     | 91 kD  |
| TBC1 domain family member 4                                                             | 147 kD |
| Dystonin                                                                                | 857 kD |
| Isoform 1 of histone-lysine N-methyltransferase, H3 lysine-36 and H4 lysine-20 specific | 297 kD |
| Collagen alpha-2(I) chain precursor                                                     | 129 kD |
| Isoform 2 of 5'-3' exoribonuclease 1                                                    | 193 kD |
| Insulin receptor substrate 1                                                            | 132 kD |
| Protein COTE1                                                                           | 71 kD  |
| Collagen alpha-1(IV) chain precursor                                                    | 161 kD |
| Similar to retinoblastoma-associated protein 140 isoform 1                              | 302 kD |
| Isoform 1 of collagen alpha-1(XXIII) chain                                              | 52 kD  |
| Hypothetical protein                                                                    | 63 kD  |
| Mov34/MPN/PAD-1 family protein                                                          | 54 kD  |
| Rho guanine nucleotide exchange factor 18                                               | 131 kD |
| Zinc finger protein 609                                                                 | 151 kD |
| Eukaryotic translation initiation factor 4 gamma 2                                      | 102 kD |
| Dynein heavy chain domain 3                                                             | 508 kD |
| Neutral amino acid transporter B                                                        | 57 kD  |
| Shroom-related protein                                                                  | 217 kD |
| Isoform 1 of ATP-dependent metalloprotease YME1L1                                       | 86 kD  |
| Ras homolog gene family, member U                                                       | 28 kD  |
| Similar to kelch-like 17                                                                | 93 kD  |
| Isoform A of trypsin-3 precursor                                                        | 32 kD  |
| Isoform 1 of serine/arginine repetitive matrix protein 2                                | 300 kD |
| Potassium/sodium hyperpolarization-activated cyclic nucleotide-gated channel 2          | 97 kD  |
| 139 kD protein                                                                          | 139 kD |
| 53 kD protein                                                                           | 53 kD  |
| Myotubularin-related protein 9                                                          | 63 kD  |
| Isoform long of ADAM 11 precursor                                                       | 83 kD  |
| ARMC5 protein                                                                           | 81 kD  |
| Conserved oligomeric Golgi complex component 1                                          | 109 kD |
| Glutamate-rich WD repeat-containing protein 1                                           | 49 kD  |
| Isoform 2 of cell division protein kinase 9                                             | 53 kD  |
| Isoform 1 of collagen alpha-5(IV) chain precursor                                       | 161 kD |
| Similar to ciliary rootlet coiled-coil, rootletin                                       | 83 kD  |
| Isoform 1 of vacuolar protein sorting-associated protein 13B                            | 449 kD |
| Tyrosine-protein kinase receptor Tie-1 precursor                                        | 125 kD |
| Nucleolar protein Nop56                                                                 | 66 kD  |
| Isoform 1 of centrosomal protein Cep290                                                 | 291 kD |
| Inner nuclear membrane protein Man1                                                     | 100 kD |
| Isoform 2 of HECT, UBA and WWE domain-containing protein 1                              | 480 kD |
| Isoform 1 of methyl-CpG-binding domain protein 2                                        | 43 kD  |
| Leiomodlin 1                                                                            | 70 kD  |
| Isoform 1 of phosphatase and actin regulator 2                                          | 70 kD  |
| Hydrocephalus inducing isoform a                                                        | 576 kD |
| Similar to SAMK3000                                                                     | 26 kD  |
| 5'-nucleotidase precursor                                                               | 63 kD  |
| Kalirin, RhoGEF kinase isoform 1                                                        | 340 kD |
| Isoform A of Lamin-A/C                                                                  | 74 kD  |
| Isoform 1 of G-protein coupled receptor 98 precursor                                    | 693 kD |
| Isoform 1 of Ras GTPase-activating protein SynGAP                                       | 147 kD |
| Isoform 2 of protein hairless                                                           | 122 kD |
| Isoform 2 of mucin and cadherin-like protein precursor                                  | 70 kD  |
| Ciliary dynein heavy chain 7                                                            | 461 kD |
| HRAS-like suppressor 2                                                                  | 17 kD  |
| WD repeat protein 72                                                                    | 123 kD |

(continued)

SUPPLEMENTARY TABLE S1. (CONTINUED)

---

|                                                                                 |        |
|---------------------------------------------------------------------------------|--------|
| Similar to Temporarily Assigned Gene name family member                         | 59 kD  |
| Shadow of prion protein                                                         | 15 kD  |
| Tyrosine-protein kinase transmembrane receptor ROR2 precursor                   | 105 kD |
| Actin-related protein 5                                                         | 68 kD  |
| HEAT repeat-containing protein 4                                                | 112 kD |
| Ribosome biogenesis regulatory protein homolog                                  | 41 kD  |
| Isoform 4 of epidermal growth factor receptor kinase substrate 8-like protein 1 | 89 kD  |

---
